# Supplementary material for: Decoding the Conformational Selective Mechanism of FGFR Isoforms: A Comparative Molecular Dynamics Simulation
Source: MDPI journal article supplement (doi:10.3390/molecules28062709), 2023-03-17
Supplement: s1 [file s1]

## Supplementary information

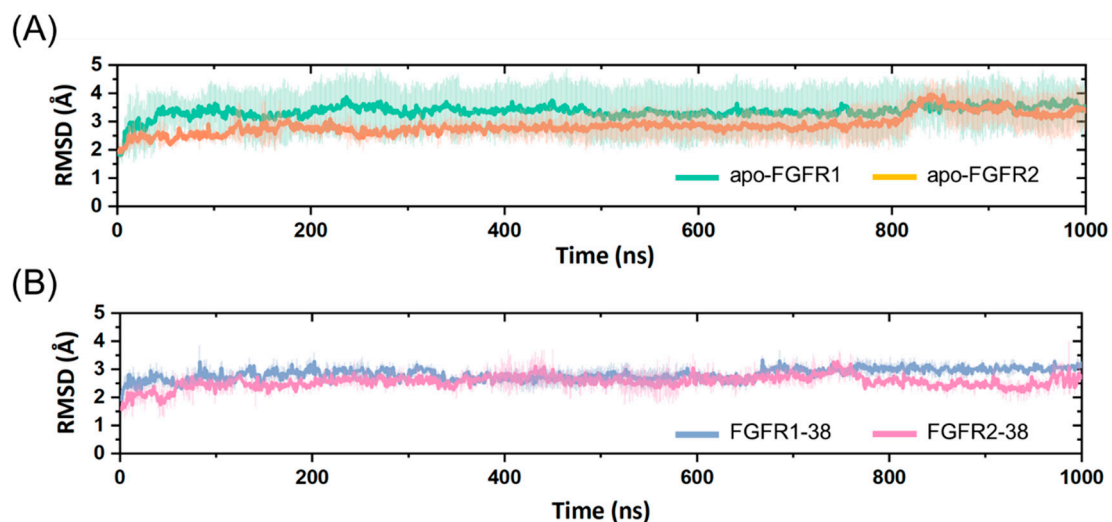

**Figure S1:** Root-mean-square deviation (RMSD) analysis for 1 $\mu$ s based on the C $\alpha$  atoms of FGFR1 and FGFR2 with respect to the initial structure. The SEM error bars show RMSD for 5 replicas related to the average value.

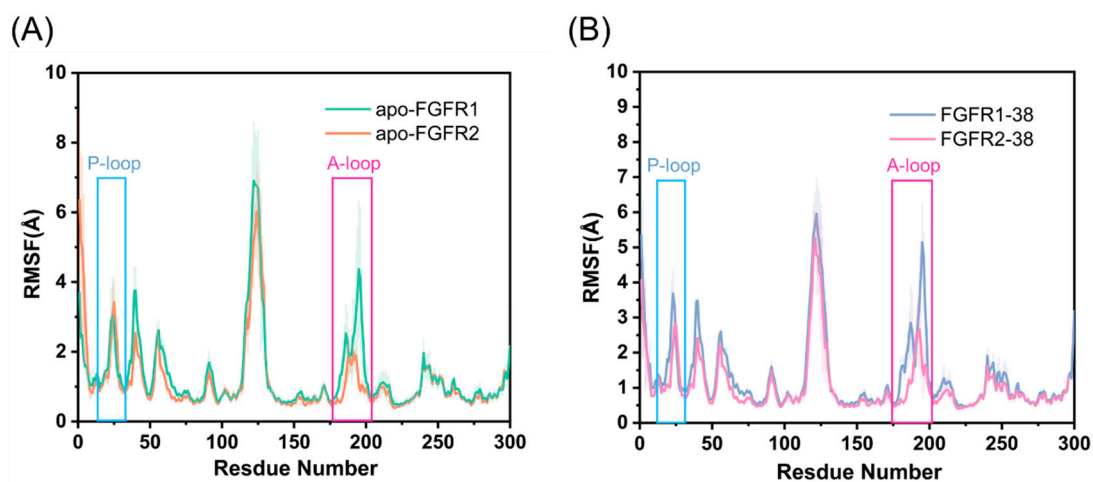

**Figure S2:** Root-mean-square fluctuations (RMSF) analysis for 1 $\mu$ s based on the C $\alpha$  atoms of FGFR1 and FGFR2 with respect to the initial structure. The SEM error bars show RMSF for 5 replicas related to the average value.

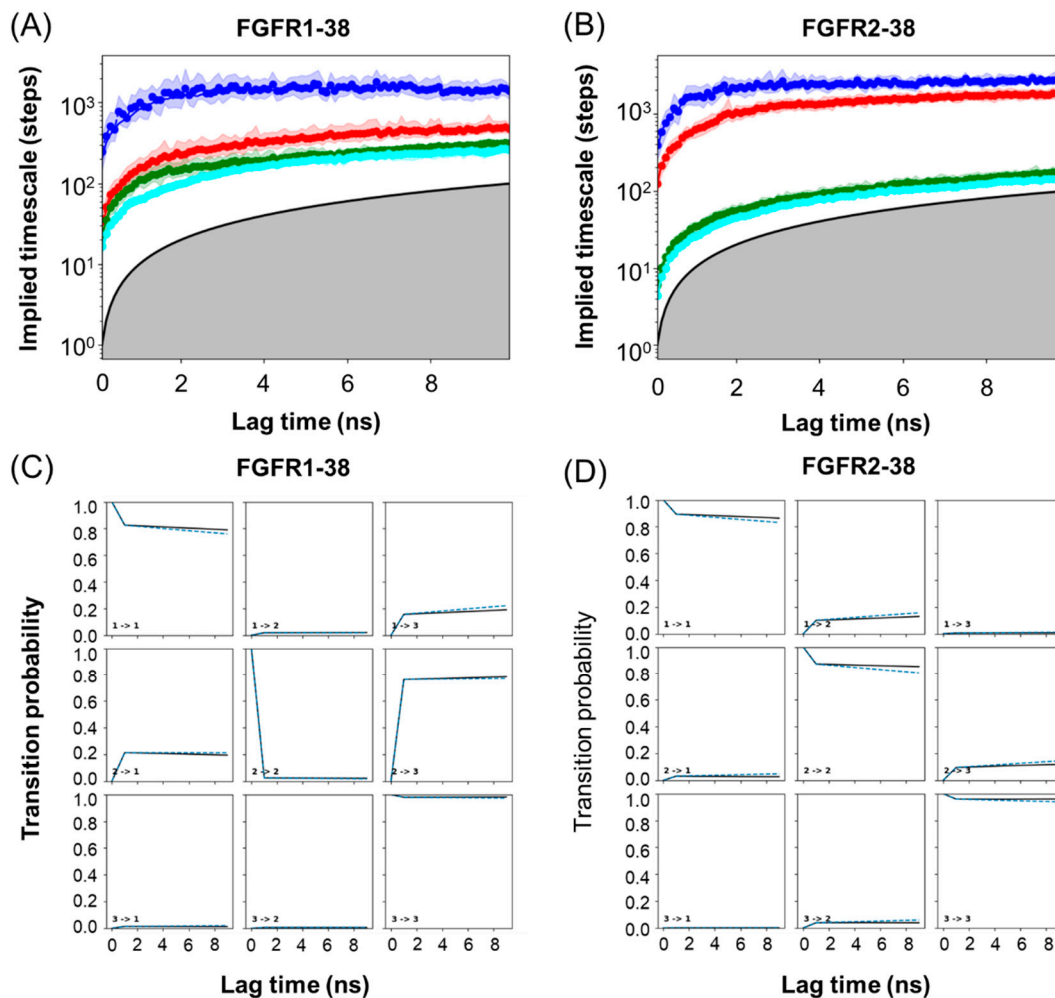

**Figure S3:** Implied timescale test for MSMs in FGFR1-38 (A) and FGFR2-38 (B) at different lag times. Blue, red, green, and cyan lines show the timescale  $\tau_1$ ,  $\tau_2$ ,  $\tau_3$  and  $\tau_4$ . Black line represents  $x=y$  in logarithmic coordinates, which separates the area where the dynamics of the processes is resolvable (white) from the non-resolvable area (grey). Chapman-Kolmogorov test of metastable states for FGFR1-38 (C) and FGFR2-38 (D) systems. The black solid estimate lines are the transition probability predicted by MSMs, while the blue dotted predict lines are practical transition probability observed in trajectories.

**Table S1:** Key hydrogen bonding interactions in FGFR1-38 complex

| Acceptor | Donor  | Frac   |
|----------|--------|--------|
| Glu562   | 38     | 80.97% |
| 38       | Lys514 | 51.78% |
| 38       | Ala564 | 19.06% |

**Table S2:** Key hydrogen bonding interactions in FGFR2-38 complex

| Acceptor | Donor  | Frac   |
|----------|--------|--------|
| Glu565   | 38     | 69.87% |
| 38       | Lys517 | 56.67% |
| 38       | Ala567 | 40.03% |

**Table S3:** The significant residues contributed more than 1 kcal/mol in compound 38 binding to FGFR1 and FGFR2 complexes, respectively.

| Residue | FGFR1-38<br>(kcal/mol) | Residue | FGFR2-38<br>(kcal/mol) |
|---------|------------------------|---------|------------------------|
| Leu484  | -2.11                  | Leu487  | -3.21                  |
| Gln491  | -1.34                  | Phe492  | -3.35                  |
| Lys514  | -3.94                  | Gly493  | -1.51                  |
| Ile545  | -1.59                  | Val495  | -2.73                  |
| Glu562  | -2.71                  | Ala515  | -1.69                  |
| Tyr563  | -2.19                  | Lys517  | -3.62                  |
| Ala564  | -2.25                  | Glu565  | -2.55                  |
| Gly567  | -1.16                  | Tyr566  | -2.96                  |
| Leu630  | -1.63                  | Ala567  | -2.32                  |
| Ala640  | -1.37                  | Gly570  | -2.49                  |
|         |                        | Leu633  | -3.17                  |
